# Supplementary material for: Expression of Flotilin-2 and Acrosome Biogenesis Are Regulated by MiR-124 during Spermatogenesis
Source: PLOS journal article supplement (doi:10.1371/journal.pone.0136671), 2015-08-27

**Supplementary information 4 More electron microscopy pictures showed the sperm defects.**

More electron microscopy pictures showed the abnormal acrosomes bar=1 $\mu$ m (a-e) ,  
bar=500nm (f-j).

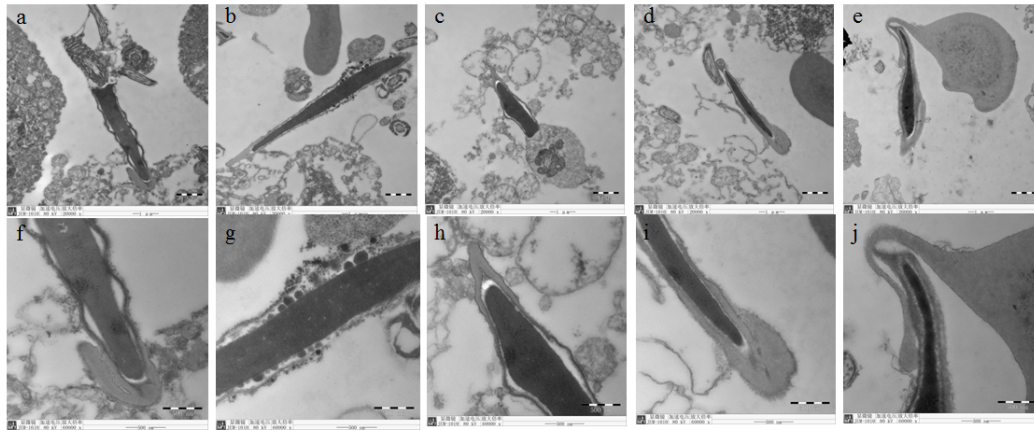

Supplement: S5 (10.1371/journal.pone.0136671.s005) [file journal.pone.0136671.s005]
